# Supplementary material for: Large-Scale Patterns of Soil Nematodes across Grasslands on the Tibetan Plateau: Relationships with Climate, Soil and Plants
Source: MDPI journal article supplement (doi:10.3390/d13080369), 2021-08-09
Supplement: s1 [file s1]

---

# 1 Tables

**Table S1.** Description of 104 sites where soil nematode samples were obtained.

| Sample Site | Longitude (E) | Latitude (N) | Elevation(m) | Vegetation type |
|-------------|---------------|--------------|--------------|-----------------|
| M-15-1      | 101.2014      | 35.2915      | 3528         | Meadow          |
| M-15-2      | 100.8318      | 35.0091      | 3836         | Meadow          |
| M-15-3      | 100.1538      | 34.4896      | 3857         | Meadow          |
| M-15-4      | 99.9401       | 34.5652      | 3756         | Meadow          |
| M-15-5      | 100.2708      | 34.2512      | 4179         | Meadow          |
| M-15-6      | 99.8313       | 33.8764      | 4212         | Meadow          |
| M-15-7      | 97.4615       | 33.1271      | 4407         | Meadow          |
| M-15-8      | 97.4014       | 33.1126      | 3998         | Meadow          |
| M-15-9      | 96.1128       | 33.1128      | 4428         | Meadow          |
| M-15-10     | 96.3188       | 33.2934      | 4331         | Meadow          |
| M-15-11     | 95.8525       | 32.9429      | 4629         | Meadow          |
| M-15-12     | 96.1478       | 32.9617      | 4267         | Meadow          |
| M-15-13     | 96.8923       | 32.8644      | 4003         | Meadow          |
| M-15-14     | 96.5565       | 32.6296      | 3906         | Meadow          |
| M-15-15     | 96.4544       | 31.5417      | 4425         | Meadow          |
| M-15-16     | 96.4014       | 31.4689      | 4105         | Meadow          |
| M-15-17     | 96.4763       | 31.1532      | 4162         | Meadow          |
| M-15-18     | 96.571        | 31.2378      | 3887         | Meadow          |
| M-15-19     | 95.613        | 31.475       | 4069         | Meadow          |
| M-15-20     | 94.2724       | 31.8964      | 4479         | Meadow          |
| M-15-21     | 93.5679       | 31.8232      | 4870         | Meadow          |
| M-15-22     | 93.3366       | 31.9156      | 4827         | Meadow          |
| M-15-23     | 91.3147       | 30.5152      | 4389         | Meadow          |
| M-15-24     | 89.7148       | 29.6577      | 4431         | Meadow          |
| M-15-25     | 92.0202       | 31.4353      | 4483         | Meadow          |
| M-15-26     | 92.0125       | 31.4206      | 4479         | Meadow          |
| S-15-1      | 100.1082      | 35.3874      | 3284         | Steppe          |
| S-15-2      | 100.5006      | 35.2462      | 3029         | Steppe          |
| S-15-3      | 96.45         | 32.3168      | 3699         | Steppe          |
| S-15-4      | 90.7124       | 30.2694      | 4474         | Steppe          |
| S-15-5      | 91.0839       | 30.4916      | 4285         | Steppe          |
| S-15-6      | 91.2745       | 29.9607      | 4598         | Steppe          |
| S-15-7      | 90.3735       | 29.9951      | 4430         | Steppe          |
| S-15-8      | 89.5055       | 29.3326      | 3872         | Steppe          |

---

|         |          |         |      |        |
|---------|----------|---------|------|--------|
| S-15-9  | 88.8023  | 29.2064 | 3912 | Steppe |
| S-15-10 | 88.4205  | 29.185  | 3947 | Steppe |
| S-15-11 | 88.1535  | 29.1432 | 4097 | Steppe |
| S-15-12 | 89.813   | 29.3073 | 3970 | Steppe |
| S-15-14 | 98.1247  | 36.0569 | 3388 | Steppe |
| M-16-1  | 98.9905  | 35.282  | 4236 | Meadow |
| M-16-2  | 99.3905  | 35.432  | 3971 | Meadow |
| M-16-3  | 98.6238  | 35.032  | 4336 | Meadow |
| M-16-4  | 98.1238  | 34.7987 | 4273 | Meadow |
| M-16-5  | 97.6071  | 35.0154 | 4257 | Meadow |
| M-16-6  | 97.3238  | 35.032  | 4254 | Meadow |
| M-16-7  | 97.4238  | 33.332  | 4181 | Meadow |
| M-16-8  | 96.9738  | 33.782  | 4673 | Meadow |
| M-16-9  | 96.6238  | 33.982  | 4488 | Meadow |
| M-16-10 | 95.7071  | 34.3154 | 4310 | Meadow |
| M-16-11 | 95.8738  | 34.1487 | 4405 | Meadow |
| M-16-12 | 94.1738  | 35.082  | 4408 | Meadow |
| M-16-13 | 95.3738  | 33.7987 | 4328 | Meadow |
| M-16-14 | 95.2738  | 33.6487 | 4656 | Meadow |
| M-16-15 | 92.8905  | 34.7654 | 4680 | Meadow |
| M-16-16 | 92.3405  | 34.032  | 4651 | Meadow |
| M-16-17 | 91.6905  | 31.8654 | 4755 | Meadow |
| M-16-18 | 91.5738  | 31.582  | 4571 | Meadow |
| M-16-19 | 92.6071  | 31.782  | 4595 | Meadow |
| M-16-20 | 91.9071  | 32.882  | 5217 | Meadow |
| M-16-21 | 91.8571  | 33.232  | 4839 | Meadow |
| M-16-22 | 98.0238  | 33.0154 | 4329 | Meadow |
| M-16-23 | 98.3405  | 32.982  | 3956 | Meadow |
| M-16-24 | 98.5905  | 32.382  | 4007 | Meadow |
| M-16-25 | 99.0738  | 31.9987 | 4016 | Meadow |
| M-16-26 | 100.1904 | 31.6154 | 3965 | Meadow |
| M-16-27 | 100.7071 | 31.6654 | 3526 | Meadow |
| M-16-28 | 99.1071  | 31.882  | 4040 | Meadow |
| M-16-29 | 99.4238  | 31.8154 | 3654 | Meadow |
| M-16-30 | 99.7571  | 31.1487 | 4238 | Meadow |
| M-16-31 | 99.6071  | 31.032  | 3977 | Meadow |
| M-16-32 | 99.3571  | 31.1154 | 3830 | Meadow |
| M-16-33 | 100.5571 | 31.982  | 3555 | Meadow |
| M-16-34 | 100.7071 | 32.9987 | 3549 | Meadow |
| M-16-35 | 100.9738 | 33.4654 | 3891 | Meadow |
| M-16-36 | 101.5071 | 37.532  | 3208 | Meadow |

---

|         |          |         |      |        |
|---------|----------|---------|------|--------|
| M-16-37 | 100.9904 | 37.7154 | 3524 | Meadow |
| M-16-38 | 101.3238 | 37.6154 | 3180 | Meadow |
| M-16-39 | 100.8404 | 37.982  | 3237 | Meadow |
| M-16-40 | 100.3571 | 38.0987 | 2930 | Meadow |
| M-16-41 | 98.9238  | 38.8487 | 3736 | Meadow |
| M-16-42 | 99.3405  | 38.6487 | 3440 | Meadow |
| M-16-43 | 99.6071  | 38.4154 | 3245 | Meadow |
| M-16-44 | 100.4738 | 37.8154 | 3484 | Meadow |
| M-16-45 | 100.5071 | 37.3654 | 3377 | Meadow |
| M-16-46 | 100.9238 | 36.982  | 3086 | Meadow |
| S-16-1  | 98.1238  | 34.9654 | 4209 | Steppe |
| S-16-2  | 95.4071  | 34.5654 | 4182 | Steppe |
| S-16-3  | 95.0238  | 34.7987 | 4302 | Steppe |
| S-16-4  | 94.4071  | 35.032  | 4346 | Steppe |
| S-16-5  | 93.9071  | 35.2654 | 4399 | Steppe |
| S-16-6  | 93.7405  | 35.5154 | 4527 | Steppe |
| S-16-7  | 93.1238  | 35.2654 | 4589 | Steppe |
| S-16-8  | 92.7238  | 34.4654 | 4536 | Steppe |
| S-16-9  | 91.7071  | 32.132  | 4733 | Steppe |
| S-16-10 | 90.5905  | 31.382  | 4552 | Steppe |
| S-16-11 | 91.0571  | 31.4987 | 4557 | Steppe |
| S-16-12 | 90.0905  | 31.432  | 4641 | Steppe |
| S-16-13 | 90.0905  | 31.432  | 4586 | Steppe |
| S-16-14 | 92.1905  | 33.7654 | 4615 | Steppe |
| S-16-15 | 92.7071  | 34.282  | 4482 | Steppe |
| S-16-16 | 100.0571 | 38.232  | 2793 | Steppe |
| S-16-17 | 100.1738 | 37.2987 | 3237 | Steppe |
| S-16-18 | 99.4071  | 37.1487 | 3238 | Steppe |
| S-16-19 | 99.8571  | 37.2654 | 3185 | Steppe |

---

**Table S2.** Soil nematode genera identified in the grassland on the Tibetan Plateau.

|                         | <b>Taxonomic rank</b> | <b>c-p class<sup>1</sup></b> | <b>p-p class</b> | <b>Feeding type</b>                      | <b>Prevalence (%) <sup>2</sup></b> |
|-------------------------|-----------------------|------------------------------|------------------|------------------------------------------|------------------------------------|
| <i>Axonchium</i>        | Genera                | -                            | 5                | Herbivores - ectoparasites               | 0.01                               |
| <i>Belondira</i>        | Genera                | -                            | 5                | Herbivores - ectoparasites               | 0.04                               |
| <i>Bitylenchus</i>      | Genera                | -                            | 3                | Herbivores - ectoparasites               | 0.14                               |
| <i>Criconemoides</i>    | Genera                | -                            | 3                | Herbivores - ectoparasites               | 0.45                               |
| <i>Helicotylenchus</i>  | Genera                | -                            | 3                | Herbivores - semi-endoparasites          | 3.01                               |
| <i>Longidorus</i>       | Genera                | -                            | 5                | Herbivores - ectoparasites               | 0.05                               |
| <i>Merlinius</i>        | Genera                | -                            | 3                | Herbivores - ectoparasites               | 2.09                               |
| <i>Pratylenchus</i>     | Genera                | -                            | 3                | Herbivores - migratory endoparasites     | 1.63                               |
| <i>Rotylenchus</i>      | Genera                | -                            | 3                | Herbivores - semi-endoparasites          | 5.37                               |
| <i>Tylenchorhynchus</i> | Genera                | -                            | 3                | Herbivores - ectoparasites               | 0.93                               |
| <i>Tylenchus</i>        | Genera                | -                            | 2                | Herbivores - epidermal/root hair feeders | 7.61                               |
| <i>Xiphinema</i>        | Genera                | -                            | 5                | Herbivores - ectoparasites               | 0.56                               |
| <i>Aphelenchoides</i>   | Genera                | 2                            | -                | Fungivores                               | 2.71                               |
| <i>Aphelenchus</i>      | Genera                | 2                            | -                | Fungivores                               | 5.47                               |
| <i>Filenchus</i>        | Genera                | 2                            | -                | Fungivores                               | 7.77                               |
| <i>Tylencholaimus</i>   | Genera                | 4                            | -                | Fungivores                               | 1.02                               |
| <i>Acrobeles</i>        | Genera                | 2                            | -                | Bacterivores                             | 3.75                               |
| <i>Acrobeloides</i>     | Genera                | 2                            | -                | Bacterivores                             | 11.45                              |
| <i>Anaplectus</i>       | Genera                | 2                            | -                | Bacterivores                             | 0.73                               |
| <i>Cephalobus</i>       | Genera                | 2                            | -                | Bacterivores                             | 7.70                               |
| <i>Cervidellus</i>      | Genera                | 2                            | -                | Bacterivores                             | 0.35                               |
| <i>Chiloplacus</i>      | Genera                | 2                            | -                | Bacterivores                             | 0.40                               |

---

|                          |        |   |   |              |      |
|--------------------------|--------|---|---|--------------|------|
| <i>Diploscapter</i>      | Genera | 1 | - | Bacterivores | 0.12 |
| <i>Eucephalobus</i>      | Genera | 2 | - | Bacterivores | 1.34 |
| <i>Heterocephalobus</i>  | Genera | 2 | - | Bacterivores | 1.34 |
| <i>Mesorhabditis</i>     | Genera | 1 | - | Bacterivores | 1.03 |
| <i>Monhystera</i>        | Genera | 2 | - | Bacterivores | 0.01 |
| <i>Panagrobelus</i>      | Genera | 1 | - | Bacterivores | 0.01 |
| <i>Panagrolaimus</i>     | Genera | 1 | - | Bacterivores | 2.45 |
| <i>Pelodera</i>          | Genera | 1 | - | Bacterivores | 0.01 |
| <i>Plectus</i>           | Genera | 2 | - | Bacterivores | 2.76 |
| <i>Prismatolaimus</i>    | Genera | 3 | - | Bacterivores | 0.23 |
| <i>Protorhabditis</i>    | Genera | 1 | - | Bacterivores | 2.47 |
| <i>Teratocephalus</i>    | Genera | 3 | - | Bacterivores | 1.26 |
| <i>Tylocephalus</i>      | Genera | 2 | - | Bacterivores | 1.01 |
| <i>Clarkus</i>           | Genera | 4 | - | Predators    | 0.30 |
| <i>Coomansus</i>         | Genera | 4 | - | Predators    | 0.07 |
| <i>Enchodelus</i>        | Genera | 4 | - | Predators    | 2.72 |
| <i>Ironus</i>            | Genera | 4 | - | Predators    | 0.52 |
| <i>Mononchulus</i>       | Genera | 4 | - | Predators    | 0.02 |
| <i>Mononchus</i>         | Genera | 4 | - | Predators    | 1.50 |
| <i>Tripyla</i>           | Genera | 3 | - | Predators    | 0.10 |
| <i>Allodorylaimus</i>    | Genera | 4 | - | Omnivores    | 0.98 |
| <i>Aporcelaimus</i>      | Genera | 5 | - | Omnivores    | 0.23 |
| <i>Discolaimus</i>       | Genera | 4 | - | Omnivores    | 0.20 |
| <i>Dorylaimus</i>        | Genera | 4 | - | Omnivores    | 1.44 |
| <i>Drepanodorylaimus</i> | Genera | 4 | - | Omnivores    | 0.01 |

---

|                       |        |   |   |                            |      |
|-----------------------|--------|---|---|----------------------------|------|
| <i>Ecumenicus</i>     | Genera | 4 | - | Omnivores                  | 0.01 |
| <i>Epidorylaimus</i>  | Genera | 4 | - | Omnivores                  | 1.50 |
| <i>Eudorylaimus</i>   | Genera | 4 | - | Omnivores                  | 1.81 |
| <i>Labronema</i>      | Genera | 4 | - | Omnivores                  | 2.89 |
| <i>Laimydorus</i>     | Genera | 4 | - | Omnivores                  | 1.66 |
| <i>Mesodorylaimus</i> | Genera | 4 | - | Omnivores                  | 1.08 |
| <i>Myiodiscus</i>     | Genera | 4 | - | Omnivores                  | 0.02 |
| Dolichodoridae        | Family | - | 3 | Herbivores - ectoparasites | 0.01 |
| Hemicycliophoridae    | Family | - | 3 | Herbivores - ectoparasites | 0.01 |
| Cephalobidae          | Family | 2 | - | Bacterivores               | 0.01 |
| Rhabditidae           | Family | 1 | - | Bacterivores               | 0.23 |
| Dorylaimidae          | Family | 4 | - | Omnivores                  | 3.08 |
| Mydonomidae           | Family | 4 | - | Omnivores                  | 0.04 |
| Qudsianematidae       | Family | 4 | - | Omnivores                  | 2.34 |

---

<sup>1</sup> Coloniser-persister classification is based on life cycle properties. Nematodes of c-p-1 are regarded as enrichment opportunists; they have short life cycles and are often found in disturbed environments. In contrast, nematodes of c-p-5 have long life cycles and tend to inhabit stable, mature ecosystems. c-p of herbivores are called p-p (Bongers 1990; Bongers et al. 1995).

<sup>2</sup> Prevalence was calculated as the percentage of samples in which a nematode genus was diagnosed with respect to total number of samples. Prevalence which was lower than 0.01% was recorded as 0.01%.

**Table S3.** Differences in the taxonomic diversity, trophic groups, and soil food web characteristics of soil nematode communities (median (interquartile range, IQR)) between alpine meadows (n=360) and alpine steppes (n=160). Bold type indicates significant differences (Wilcoxon rank-sum test). Different letters in each column of trophic groups indicate significant differences between trophic groups within the ecosystem (Dwass–Steel–Critchlow–Fligner test,  $p < 0.001$ ).

|                                                | Meadows                  | Steppes                   | p-value |
|------------------------------------------------|--------------------------|---------------------------|---------|
| <i>Taxonomic diversity</i>                     |                          |                           |         |
| Abundance<br>(individuals/100 g of dried soil) | 52.6 (80.2)              | 31.2 (40.4)               | 0.001   |
| Genus richness (genus)                         | 16.0 (13.0)              | 13.0 (9.3)                | 0.001   |
| <i>Trophic groups</i>                          |                          |                           |         |
| Plant parasites (%)                            | 20.0 (20.3) <sup>a</sup> | 17.3 (17.0) <sup>a</sup>  | 0.019   |
| Fungivores (%)                                 | 15.8 (11.6) <sup>b</sup> | 16.1 (14.5) <sup>a</sup>  | 0.695   |
| Bacterivores (%)                               | 37.2 (21.9) <sup>c</sup> | 40.6 (20.8) <sup>b</sup>  | 0.082   |
| Predators (%)                                  | 0.3 (4.3) <sup>d</sup>   | 0 (0.3) <sup>c</sup>      | 0.001   |
| Omnivores (%)                                  | 17.9 (13.7) <sup>e</sup> | 19.6 (14.8) <sup>bd</sup> | 0.397   |
| <i>Soil food web characteristics</i>           |                          |                           |         |
| Structure Index                                | 33.2 (22.3)              | 30.3 (20.2)               | 0.270   |
| Enrichment Index                               | 31.9 (15.2)              | 32.4 (16.5)               | 0.544   |
| Channel Index                                  | 49.5 (69.1)              | 45.5 (59.2)               | 0.104   |

**Table S4.** Partial redundancy analysis of the relationships between the genus composition of nematode community and environmental variables in the alpine meadows and alpine steppes. pH: soil pH, MOI: soil moisture (%), TN: total nitrogen (mg/g), NH<sub>4</sub>: ammonium (mg/kg), NO<sub>3</sub>: nitrate (mg/kg), PSR: plant species richness, PBM: plant biomass (g/m<sup>2</sup>), PCV: plant coverage (%).

| Variable        | Alpine Meadow |       |              | Alpine Steppe |        |              |
|-----------------|---------------|-------|--------------|---------------|--------|--------------|
|                 | F             | p     | Significance | F             | p      | Significance |
| pH              | 0.723         | 0.610 |              | 1.141         | 0.279  |              |
| MOI             | 11.216        | 0.001 | ***          |               |        |              |
| TN              | 4.485         | 0.005 | **           |               |        |              |
| NH <sub>4</sub> | 0.723         | 0.014 | *            |               |        |              |
| NO <sub>3</sub> |               |       |              | 2.597         | 0.0363 | *            |
| PCV             | 0.723         | 0.532 |              |               |        |              |
| PSR             |               |       |              | 0.592         | 0.8255 |              |
| PBM             |               |       |              | 1.937         | 0.0683 |              |



**Table S5.** Partial redundancy analysis of the relationships between the trophic composition of nematode community and environmental variables in the alpine meadows and alpine steppes. pH: soil pH, MOI: soil moisture (%), TN: total nitrogen (mg/g), TP: total phosphorus (mg/g), NH<sub>4</sub>: ammonium (mg/kg), PBM: plant biomass (g/m<sup>2</sup>), PCV: plant coverage (%).

| Variable        | Alpine Meadow |       |              | Alpine Steppe |       |              |
|-----------------|---------------|-------|--------------|---------------|-------|--------------|
|                 | F             | p     | Significance | F             | p     | Significance |
| MOI             | 6.176         | 0.010 | *            | 1.573         | 0.191 |              |
| TN              | 2.834         | 0.060 |              |               |       |              |
| TP              | 2.686         | 0.068 |              |               |       |              |
| NH <sub>4</sub> |               |       |              | 3.915         | 0.028 | *            |
| PCV             | 0.287         | 0.826 |              | 4.416         | 0.016 | *            |
| PBM             |               |       |              | 3.318         | 0.043 | *            |

**Table S6.** Multiple regression of the effects of environmental variables on soil nematodes in the alpine meadows. Nematode's abundance is calculated as individuals/100 g of dried soil. Richness is the genus richness of nematodes. Trophic groups, such as plant parasites, fungivores, bacterivores, predators and omnivores, are represented as relative abundances (%). Each individual predictor's contribution was calculated by lmg in the relaimpo package in R, which is the  $r^2$  contribution averaged over orderings among regressors. The +/- symbols indicate positive/negative correlations. pH: soil pH, MOI: soil moisture (%), TN: total nitrogen (mg/g), TP: total phosphorus (mg/g), NH4: ammonium (mg/kg), PCV: plant coverage (%).

|                 | Contribution of the predictor (%) |              |           |            |           |           |           |           |
|-----------------|-----------------------------------|--------------|-----------|------------|-----------|-----------|-----------|-----------|
|                 | $r^2$                             | $p$          | pH        | MOI        | TN        | TP        | NH4       | PCV       |
| Abundance       | 0.21                              | <b>0.001</b> |           | 81.34 (+)  | 18.66 (-) |           |           |           |
| Richness        | 0.12                              | <b>0.001</b> | 42.66 (+) | 11.08 (+)  | 17.52 (-) | 11.77 (+) | 16.97 (-) |           |
| Plant parasites | 0.09                              | <b>0.001</b> | 56.37 (-) | 13.66 (-)  |           |           | 29.96 (+) |           |
| Fungivores      | 0.01                              | 0.148        |           | 100.00 (-) |           |           |           |           |
| Bacterivores    | 0.04                              | <b>0.007</b> | 51.64 (+) |            |           |           |           | 48.36 (+) |
| Predators       | 0.11                              | <b>0.001</b> |           | 58.32 (+)  | 13.88 (-) | 4.23 (+)  | 18.75 (-) | 4.83 (-)  |
| Omnivores       | 0.10                              | <b>0.001</b> | 16.53 (+) | 43.66 (+)  | 8.08 (-)  | 4.02 (+)  |           | 27.70 (-) |
| EI              | 0.07                              | <b>0.001</b> | 12.09 (+) | 31.93 (+)  |           | 49.45 (+) |           | 6.53 (-)  |
| SI              | 0.10                              | <b>0.001</b> |           | 54.86 (+)  | 12.11 (-) | 5.42 (+)  | 4.12 (-)  | 23.49 (-) |
| CI              | 0.09                              | <b>0.001</b> | 29.59 (-) | 9.70 (-)   |           | 60.70 (-) |           |           |

**Table S7.** Multiple regression of the effects of environmental variables on soil nematodes in the alpine steppes. Nematode's abundance is calculated as individuals/100 g of dried soil. Richness is the genus richness of nematodes. Trophic groups, such as plant parasites, fungivores, bacterivores, predators and omnivores, are represented as relative abundances (%). The individual predictor's contribution was calculated by lmg in the relaimpo package in R, which is the  $r^2$  contribution averaged over orderings among regressors. The +/- symbols indicate positive/negative correlations. pH: soil pH, MOI: soil moisture (%), NH4: ammonium (mg/kg), NO3: nitrate (mg/kg), PBM: plant biomass (g/m<sup>2</sup>), PCV: plant coverage (%), PSR: plant species richness.

|                 | Contribution of the predictor (%) |              |           |           |           |           |           |            |           |
|-----------------|-----------------------------------|--------------|-----------|-----------|-----------|-----------|-----------|------------|-----------|
|                 | $r^2$                             | $p$          | pH        | MOI       | NH4       | NO3       | PBM       | PCV        | PSR       |
| Abundance       | 0.3                               | <b>0.001</b> | 11.33 (-) | 65.60 (+) | 14.99 (+) |           | 3.91 (-)  |            | 4.18 (+)  |
| Richness        | 0.23                              | <b>0.001</b> | 6.57 (-)  | 37.01 (+) |           |           | 36.24 (-) | 20.19 (+)  |           |
| Plant parasites | 0.07                              | <b>0.015</b> |           |           |           |           |           | 53.67 (+)  | 46.33 (+) |
| Fungivores      | 0.14                              | <b>0.002</b> | 29.39 (-) | 14.02 (-) |           |           | 20.85 (+) |            | 35.74 (+) |
| Bacterivores    | 0.09                              | <b>0.029</b> | 8.49 (-)  |           | 24.68 (+) |           | 41.72 (-) |            | 25.11 (-) |
| Predators       | 0.02                              | 0.127        |           |           |           |           |           | 100.00 (+) |           |
| Omnivores       | 0.23                              | <b>0.001</b> | 13.82 (+) | 15.62 (+) | 20.97 (-) | 10.06 (-) | 7.67 (+)  | 31.85 (-)  |           |
| EI              | 0.1                               | <b>0.003</b> | 56.10 (-) |           | 43.90 (-) |           |           |            |           |
| SI              | 0.19                              | <b>0.002</b> | 2.83 (+)  | 13.74 (+) | 20.14 (-) | 12.70 (-) | 8.44 (+)  | 22.84 (-)  | 19.32 (-) |
| CI              | 0.1                               | <b>0.007</b> | 40.25 (+) | 28.08 (-) |           |           |           |            | 31.66 (+) |

**Figure S1.** biplots of partial redundancy analysis of the relationships between the genus composition of nematode community and environmental variables in the alpine meadows (a) and alpine steppes (b), and the relationships between the trophic composition of nematode community and environmental variables in the alpine meadows (c) and alpine steppes (d). pH: soil pH, MOI: soil moisture (%), TN: total nitrogen (mg/g), NH4: ammonium (mg/kg), NO3: nitrate (mg/kg), PSR: plant species richness, PBM: plant biomass (g/m<sup>2</sup>), PCV: plant coverage (%).

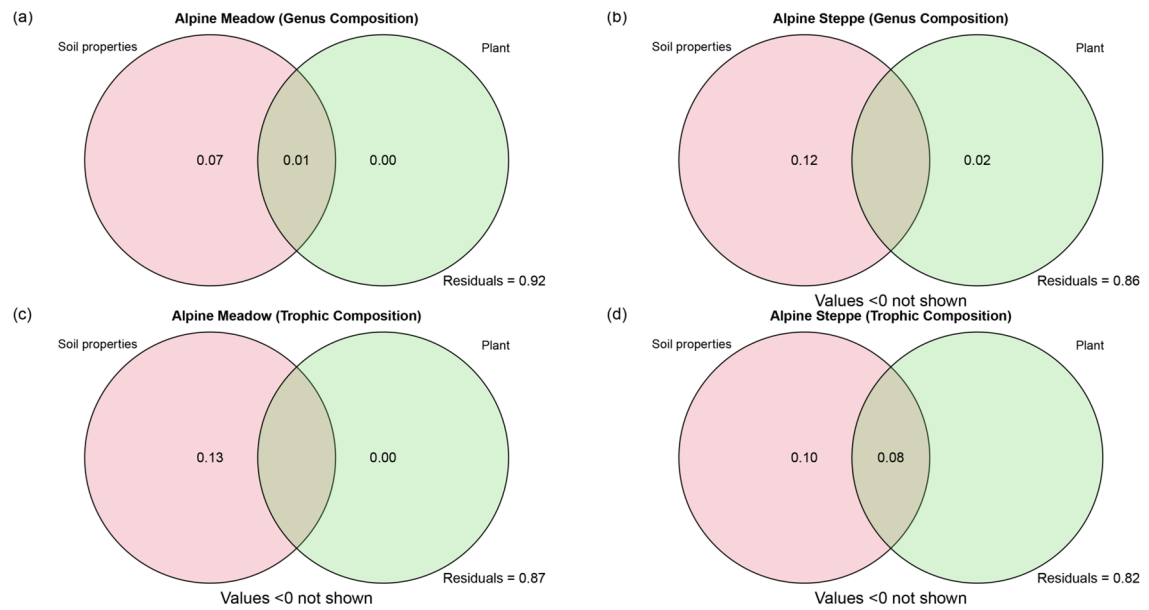

**Figure S2.** Variation partitioning analyses explained by variable sets of soil properties, aboveground plants and climate for nematode genus and trophic compositions between alpine meadow and alpine steppe. Unique fractions of each explanatory set were evaluated by 9999 permutations.

---

### 3 Nematode analyses

Species richness, which represented the number of nematode genera, and abundance were used as measures of diversity for the soil nematode community. For each trophic group, the abundance proportion was used to perform analyses.

As suggested by Ferris et al. (2001), the enrichment index (EI) and structure index (SI) were used to assess the food web response to the availability of resources in the soil and to determine whether the soil community was basal (typical of disturbed systems) or structured (typical of stable systems).

$$EI = 100 \times \frac{e}{e + b}$$

$$SI = 100 \times \frac{s}{s + b}$$

where  $e$  is the abundance of nematodes in the enrichment component weighted by  $k_e$  values;  $b$  is the abundance of nematodes in the basal component weighted by  $k_b$  values;  $s$  is the abundance of nematodes in the structural component weighted by  $k_s$  values;  $k_e$  is the weighting assigned to the guilds  $Ba_1$  and  $Fu_2$  (enrichment component);  $k_b$  is the weighting assigned to the guilds  $Ba_2$  and  $Fu_2$  (basal component); and  $k_s$  is the weighting assigned to the guilds  $Ba_{3-5}$ ,  $Fu_{3-5}$ ,  $Om_{4-5}$  and  $Pr_{2-5}$  (structural component).

Channel Index (CI) is a powerful index for assessing the soil decomposition process and analyzing nematode assemblages, as described by Ferris et al (2001). The CI ranges from 0 (totally bacterially mediated) to 100 (totally fungally mediated). In the following equation,  $Fu_2$  and  $Ba_2$  are the numbers of fungivores with c-p 2 and bacterivores with c-p 2, respectively.

$$CI = 100 \times \frac{0.8 \times Fu_2}{3.2 \times Ba_1 + 0.8 \times Fu_2}$$

Rényi diversity is the generalized case of species number, shannon diversity, inverse simpson and etc. (Rényi 1961; Tóthmérész 1995). It improved the measurement of diversity by methods of diversity ordering, and it was sensitive to the rare and abundant species as the scale parameter changes (Tóthmérész 1995).

$$H_{\alpha}(X) = \frac{1}{1 - \alpha} \log \left( \sum_{i=1}^n p_i^{\alpha} \right)$$

When the sensitivity parameter  $\alpha=0$ , the value is the species number,  $\alpha=1$  is the exponential Shannon,  $\alpha=2$  is the inverse Simpson, and  $\alpha=\infty$  is the inverse relative dominance (Tóthmérész 1995; Oksanen et al. 2007). According to the theory of diversity ordering, one community can be regarded as more diverse than another only if its Rényi diversities are all higher (Tóthmérész 1995).

## References

- Bongers T (1990) The maturity index: an ecological measure of environmental disturbance based on nematode species composition. *Oecologia* 83:14–19. <https://doi.org/10.1007/BF00324627>
- Bongers T, Goede RGM de, Korthals GW, Yeates GW (1995) Proposed changes of c-p classification for nematodes. *Russ J Nematol* 3:61–62
- Ferris H, Bongers T, de Goede RGM (2001) A framework for soil food web diagnostics: extension of the nematode faunal analysis concept. *Appl Soil Ecol* 18:13–29. [https://doi.org/10.1016/S0929-1393\(01\)00152-4](https://doi.org/10.1016/S0929-1393(01)00152-4)
- Oksanen J, Kindt R, Legendre P, et al (2007) The Vegan Package
- Rényi A (1961) On measures of entropy and information. In: *Proceedings of the Fourth Berkeley Symposium on Mathematical Statistics and Probability*. University of California Press, pp 547–561
- Tóthmérész B (1995) Comparison of different methods for diversity ordering. *J Veg Sci* 6:283–290. <https://doi.org/10.2307/3236223>
